# Supplementary material
Source: Springer Nature journal article supplement (https://www.springermedizin.de/resource/supplementary/12985_2011_1544_MOESM11_ESM.pdf/9610044)

# Alignment of I $\kappa$ B $\alpha$ Ank3 and p53BP2 Ank5 Helices

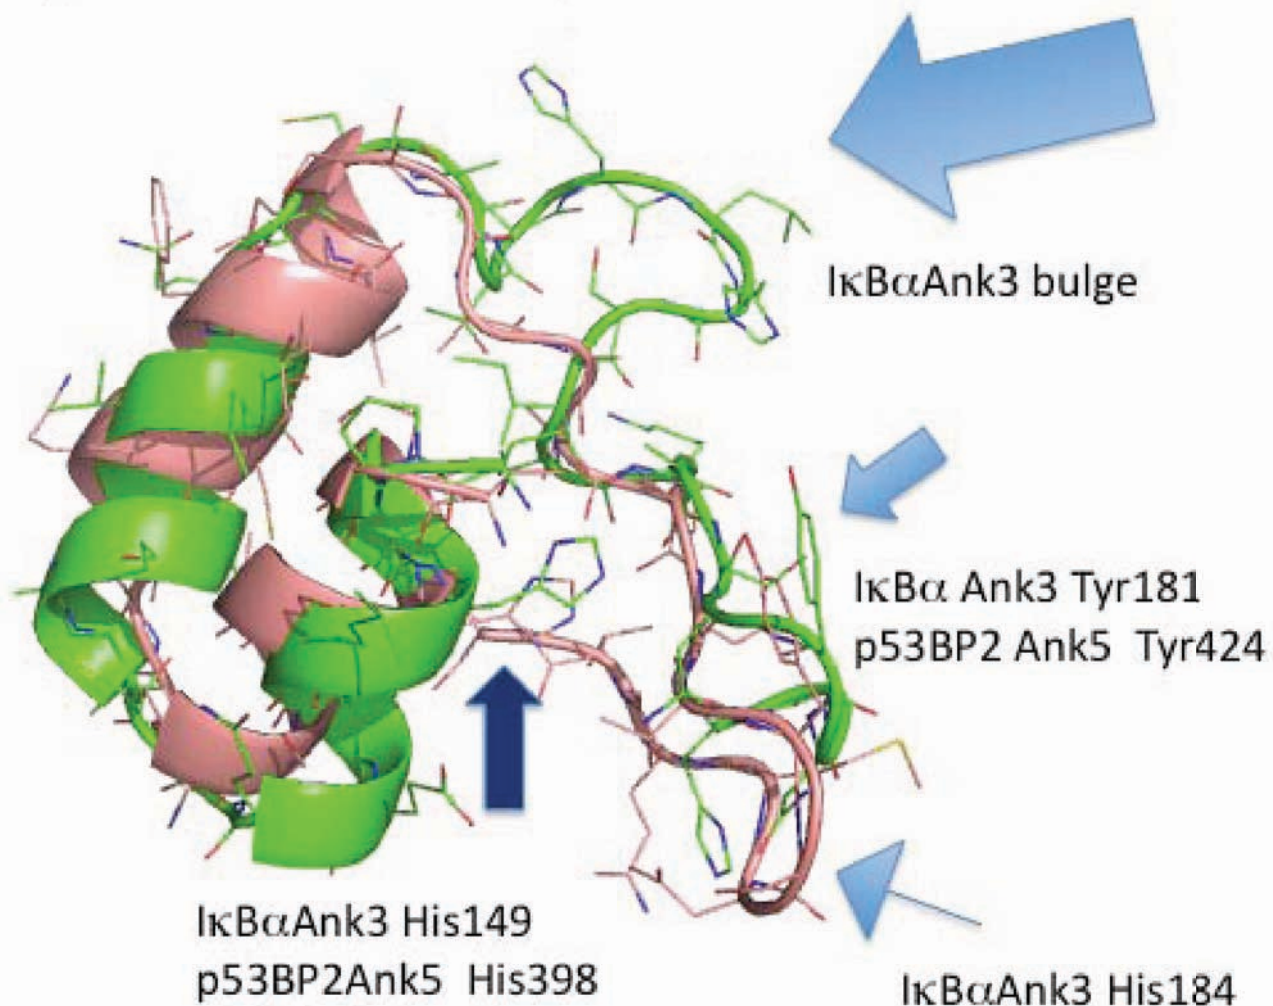

Supplement: MOESM11 [file 9610044]
